# Supplementary material for: Layered manganese-based metal–organic framework as a high capacity electrode material for supercapacitors
Source: Royal Society of Chemistry journal article supplement (doi:10.1039/c7ra04374k), 2017-01-01
Supplement: c7ra04374k1.pdf [file c7ra04374k1.pdf]

## Supporting information

### Layered manganese-based metal-organic framework as a high capacity electrode material for supercapacitors

Xianmei Wang<sup>a</sup>, Xiuxiu Liu<sup>a</sup>, Hongren Rong<sup>a</sup>, Yidan Song<sup>a</sup>, Hao Wen<sup>a</sup>,

Qi Liu\*<sup>a,b</sup>

<sup>a</sup>School of Petrochemical Engineering, Jiangsu Key Laboratory of Advanced

Catalytic Materials and Technology, and Advanced Catalysis and Green

Manufacturing Collaborative Innovation Center, Changzhou University, 1 Gehu Road,

Changzhou, Jiangsu 213164, P. R. China. E-mail: liuqi62@163.com, Tel./Fax:+86

51986330906

<sup>b</sup>State Key Laboratory of Coordination Chemistry, Nanjing University, Nanjing,

Jiangsu 210093, China

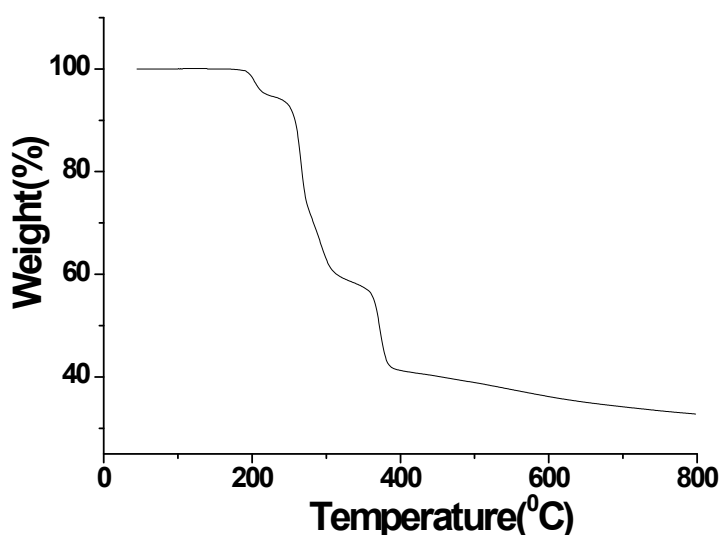

Figure S1 TGA curve of as-synthesized Mn-LMOF

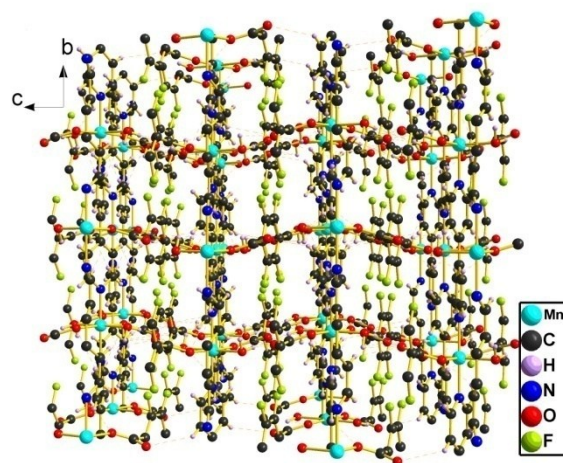

**Figure S2** 3D view of Mn-LMOF

**Table S1.** Specific capacitance of Mn-LMOF electrode in this study, compared with some MOF-based and Mn-based materials electrodes reported in previous literature.

| Electrode material                   | Specific capacitance                                                  | Electrode configuration | Remarks                                                 | Ref. |
|--------------------------------------|-----------------------------------------------------------------------|-------------------------|---------------------------------------------------------|------|
| Co-MOF film                          | 206 F g <sup>-1</sup> at 0.6 Ag <sup>-1</sup> in 1 M LiOH solution    | Three                   | Potential window 0–0.5 V for charge–discharge           | 34   |
| Co-BPDC MOF film                     | 179 F g <sup>-1</sup> at 10 mVs <sup>-1</sup> in 0.5 M LiOH solution  | Three                   | Specific capacitance was measured in cyclic voltammetry | 35   |
| meso-and microporous Co-MOF          | 230.5 F g <sup>-1</sup> at 0.5 A g <sup>-1</sup> in 1 M LiOH solution | Three                   | Potential window 0–0.6 V for charge–discharge           | 36   |
| PANI-ZIF-67-CC                       | 2146 mF cm <sup>-2</sup> at 10 mV s <sup>-1</sup> in 3 M KCl solution | Three                   | Areal capacitance was measured in cyclic voltammetry    | 37   |
| 2D Layered Co-LMOF                   | 2474 F g <sup>-1</sup> at 1 A g <sup>-1</sup> in 1 M KOH solution     | Three                   | High rate capability, good cyclic stability             | 38   |
| Layered structural Co-MOF nanosheets | 2654 F g <sup>-1</sup> at 1 A g <sup>-1</sup> in 5 M KOH solution     | Three                   | High rate capability, good cyclic stability             | 39   |
| Zr-LMOF                              | 1144 F g <sup>-1</sup> at 5 mVs <sup>-1</sup> in 6 M KOH solution     | Three                   | Specific capacitance was measured in cyclic voltammetry | 41   |
| ZIF-67 microflowers                  | 202.6 F g <sup>-1</sup> at 0.5 A g <sup>-1</sup> in 1 M KOH solution  | Three                   | Potential window 0–0.45 V for charge–discharge          | 42   |
| Ni-MOF-24                            | 1127 F g <sup>-1</sup> at 0.5 A g <sup>-1</sup> in 6 M KOH solution   | Three                   | High rate capability, good cyclic stability             | 43   |

|                                                                        |                                                                                                        |       |                                                                                                 |               |
|------------------------------------------------------------------------|--------------------------------------------------------------------------------------------------------|-------|-------------------------------------------------------------------------------------------------|---------------|
| Zn-doped Ni-MOF                                                        | 1620 F g <sup>-1</sup> at 0.25 A g <sup>-1</sup> in 6 M KOH solution                                   | Three | High rate capability, good cyclic stability                                                     | 44            |
| Ni <sub>3</sub> (btc) <sub>2</sub> ·12H <sub>2</sub> O                 | 726 F g <sup>-1</sup> at 1 A g <sup>-1</sup> in 2 M KOH solution                                       | Three | Potential window 0–0.5 V for charge–discharge                                                   | 45            |
| Ni-DMOF-ADC                                                            | 552 F g <sup>-1</sup> at 1 A g <sup>-1</sup> in 2 M KOH solution                                       | Three | Potential window 0–0.45 V for charge–discharge                                                  | 46            |
| Ni <sub>3</sub> (HITP) <sub>2</sub>                                    | 111 F g <sup>-1</sup> at 1 A g <sup>-1</sup> and 18 μF cm <sup>-2</sup> in 1 M TEABF <sub>4</sub> /ACN | Two   | Potential window 0–1.0 V for charge–discharge                                                   | 50            |
| Cd <sub>2</sub> (TDC) <sub>2</sub> (L) <sub>2</sub> ·2H <sub>2</sub> O | 22 F g <sup>-1</sup> at 2.5 mA g <sup>-1</sup> in 1 M Li <sub>2</sub> SO <sub>4</sub> solution         | Two   | Potential window 0–1.3 V for charge–discharge                                                   | 51            |
| Cu-LCP                                                                 | 1274 and 1102 F g <sup>-1</sup> at 1 A g <sup>-1</sup> in 1 M LiOH and 1M KOH solution respectively    | Three | High rate capability, good cyclic stability, and potential window 0–0.5 V for charge– discharge | 53            |
| CNTs@Mn-MOF                                                            | 203.1 F g <sup>-1</sup> at 1 A g <sup>-1</sup> in 1 M Na <sub>2</sub> SO <sub>4</sub>                  | Three | Potential window 0–1.0 V for charge–discharge                                                   | 55            |
| MnO <sub>2</sub> nanoparticles                                         | 221.2 F g <sup>-1</sup> at 2 mVs <sup>-1</sup> in 0.25 M Na <sub>2</sub> SO <sub>4</sub>               | Three | Potential window -0.1–0.9 V for charge–discharge                                                | 7             |
| Mn <sub>2</sub> O <sub>3</sub> hollow microspheres                     | 1651 F g <sup>-1</sup> at 0.5 A g <sup>-1</sup> in 6 M KOH solution                                    | Three | High rate capability, good cyclic stability                                                     | 9             |
| Porous nanostructured Mn <sub>3</sub> O <sub>4</sub>                   | 232.5 F g <sup>-1</sup> at 0.5 A g <sup>-1</sup> in 1M Na <sub>2</sub> SO <sub>4</sub>                 | Three | Potential window 0–1.0 V for charge–discharge                                                   | 11            |
| Mn-LMOF                                                                | 1098 F g <sup>-1</sup> at 1 A g <sup>-1</sup> in 1 M KOH solution                                      | Three | High rate capability, good cyclic stability                                                     | Present study |

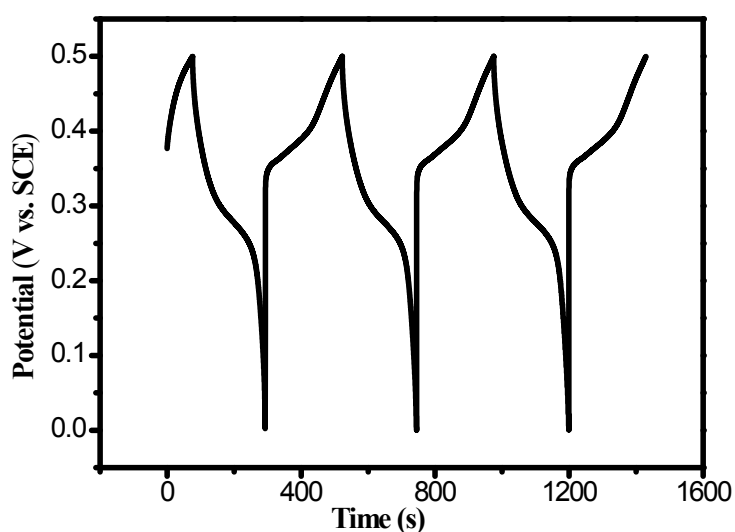

**Figure S3** The charge-discharge curves of the Mn-LMOF electrode in KOH solution

at a current density of  $3\text{ A g}^{-1}$ .

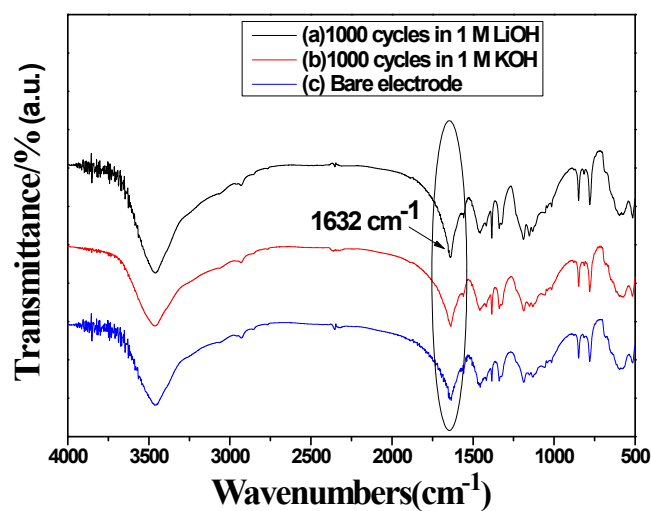

**Figure S 4** FT-IR spectra of the Mn-LMOF (a) 1000 cycles in 1 M LiOH, (b) 1000 cycles in 1 M KOH, (c) bare electrode containing Mn-LMOF, acetylene black and PTFE.

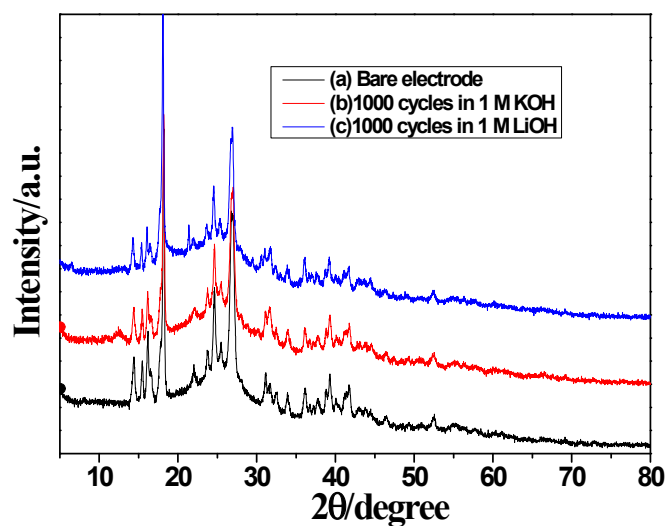

**Figure S5** XRD patterns of Mn-LMOF (a) bare electrode containing Mn-LMOF, acetylene black and PTFE, (b) after 1000 cycles in 1 M KOH and (c) 1M LiOH.

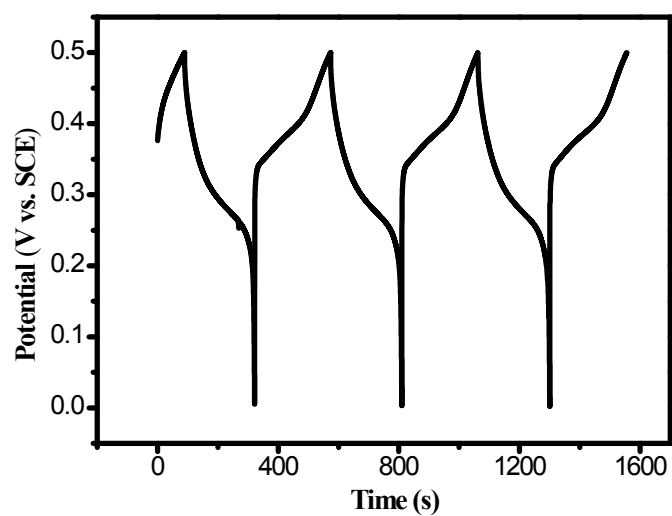

**Figure S6** The charge-discharge curves of the Mn-LMOF electrode in LiOH solution at a current density of  $3\text{A g}^{-1}$ .
